# Supplementary material
Source: PubMed Central journal article supplement (PMC3593948)

A.

Ph+MD9 - 3 wk Tx

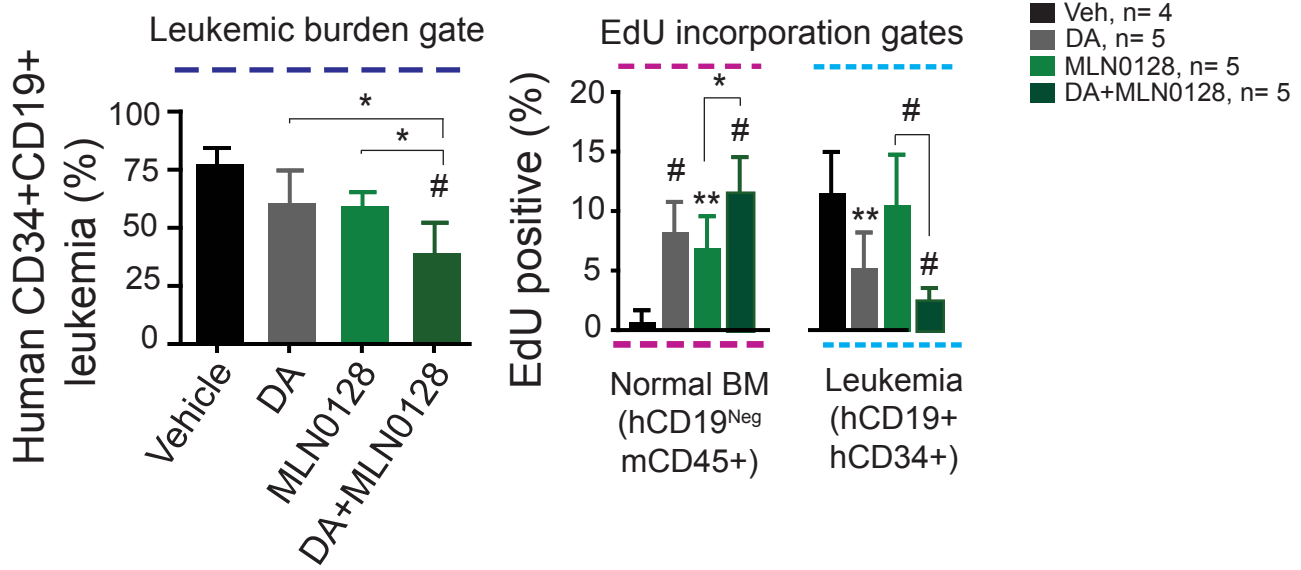

B.

Ph+MD4 (T315I) - 1.5 wk Tx

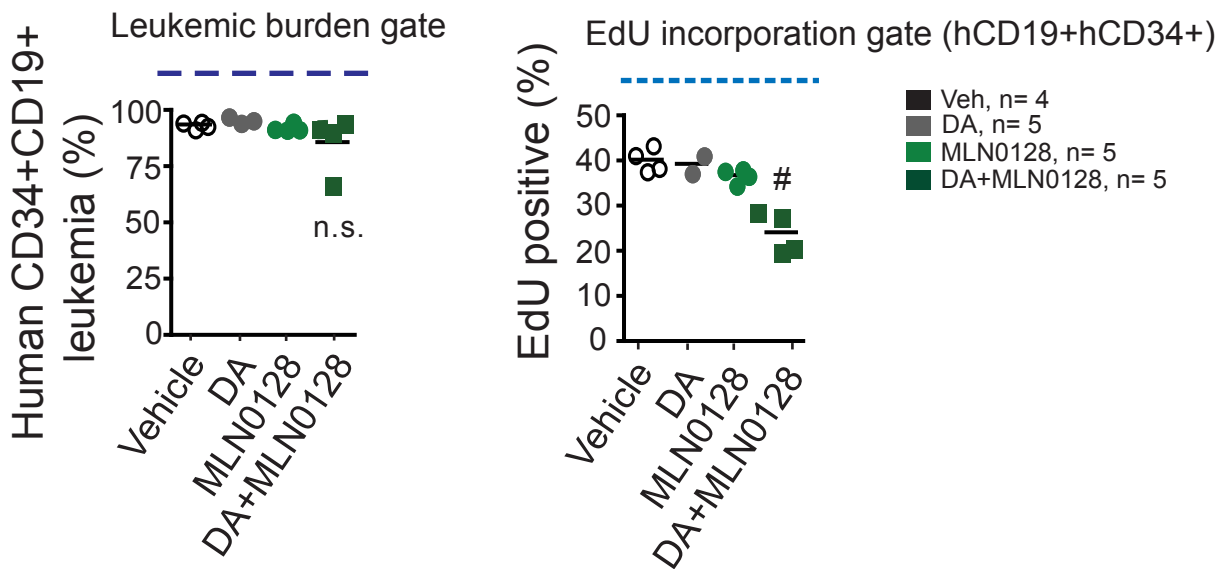

# Supplementary figure 3

## A. CHOC1 - 2wk Tx following acute engraftment

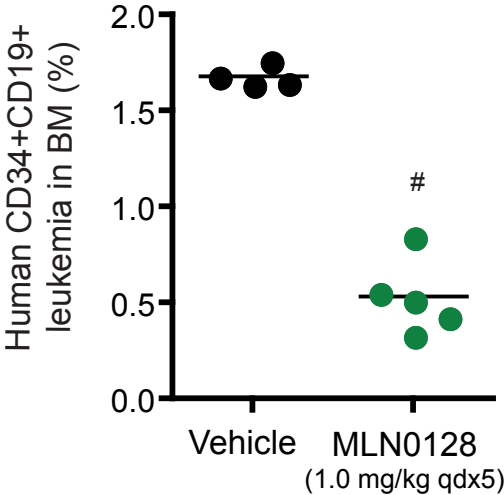

## B. CHOC23 - 2wk Tx following acute engraftment

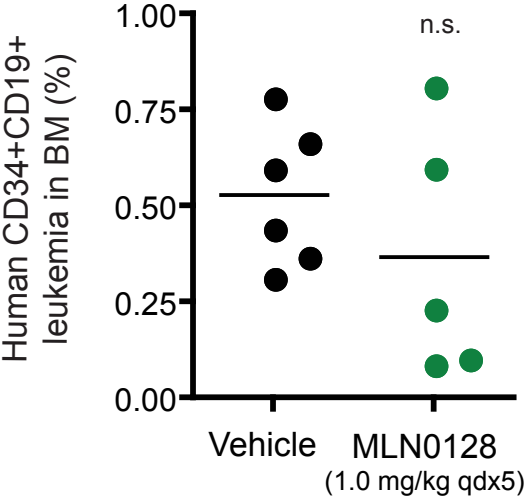

# Supplementary figure 4.

A.

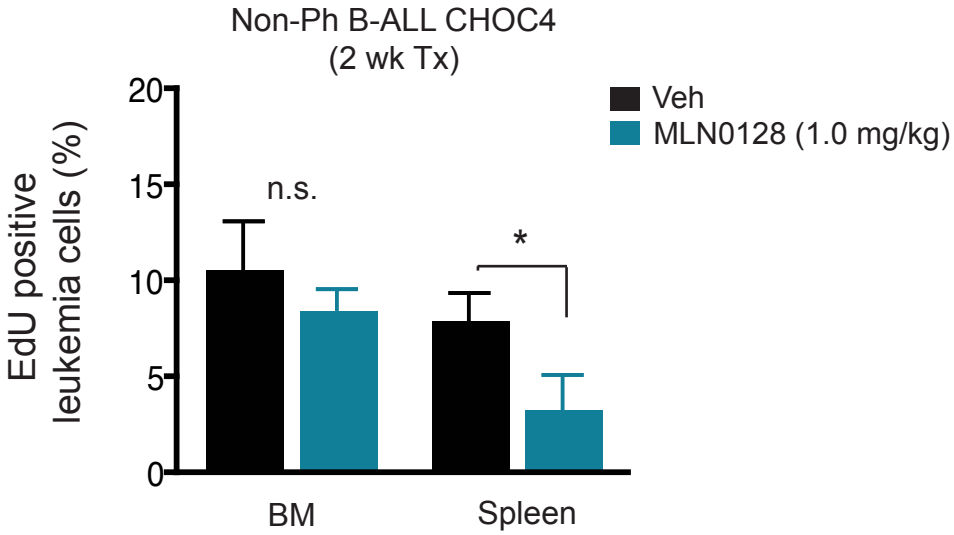

B.

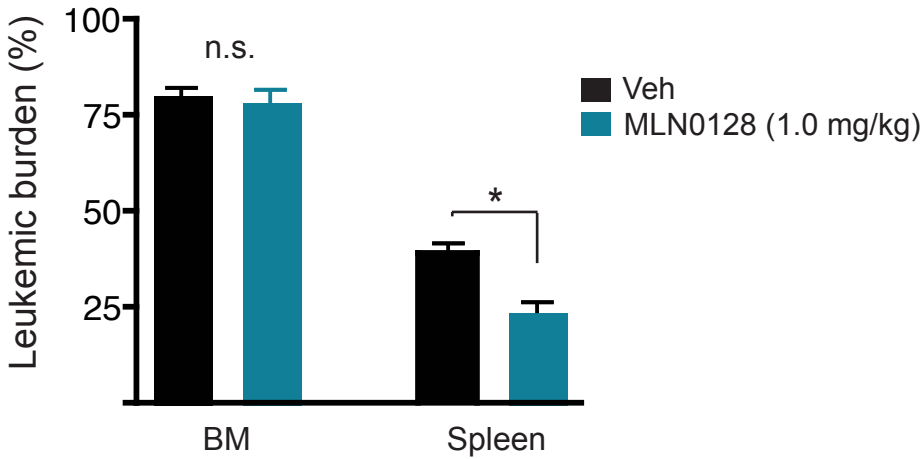

Supplement: NIHMS429751-supplement-Supplementary_Figures.pdf [file NIHMS429751-supplement-Supplementary_Figures.pdf]
